# Supplementary material for: Prediction of Potential Suitable Distribution Areas for an Endangered Salamander in China
Source: MDPI journal article supplement (doi:10.3390/ani14091390), 2024-05-06
Supplement: s1 [file s1]

**Table S1.** The distribution data of *Liua shihi* collected in published literatures.

| Species           | Longitude | Latitude | Reference                                                                                                                                                                                                                                                                  |
|-------------------|-----------|----------|----------------------------------------------------------------------------------------------------------------------------------------------------------------------------------------------------------------------------------------------------------------------------|
| <i>Liua shihi</i> | 106.4036  | 29.8116  | Li, H.; Liu, X. Investigation on amphibian and reptile resources in Jinyun Mountain Nature Reserve of Chongqing City. <i>Guizhou Agricultural Sciences</i> <b>2010</b> , 38, 170-172. (In Chinese with English Abstract)                                                   |
| <i>Liua shihi</i> | 107.6     | 31.5     |                                                                                                                                                                                                                                                                            |
| <i>Liua shihi</i> | 108.45    | 31.52    |                                                                                                                                                                                                                                                                            |
| <i>Liua shihi</i> | 108.58    | 31.78    |                                                                                                                                                                                                                                                                            |
| <i>Liua shihi</i> | 109.91    | 31.33    | Zeng, X.M.; Fu, J.Z.; Chen, L.Q.; etc. Cryptic species and systematics of the hynobiid salamanders of the <i>Liua</i> - <i>Pseudohynobius</i> complex: Molecular and phylogenetic perspectives. <i>Biochem Syst Ecol</i> 2006, 34, 467-477, doi:10.1016/j.bse.2006.01.006. |
| <i>Liua shihi</i> | 110.14    | 31.17    |                                                                                                                                                                                                                                                                            |
| <i>Liua shihi</i> | 110.25    | 31.41    |                                                                                                                                                                                                                                                                            |
| <i>Liua shihi</i> | 110.27    | 31.43    |                                                                                                                                                                                                                                                                            |
| <i>Liua shihi</i> | 110.28    | 31.43    |                                                                                                                                                                                                                                                                            |
| <i>Liua shihi</i> | 109.8     | 31.48    |                                                                                                                                                                                                                                                                            |
| <i>Liua shihi</i> | 108.6716  | 31.9534  |                                                                                                                                                                                                                                                                            |
| <i>Liua shihi</i> | 109.4705  | 31.0246  |                                                                                                                                                                                                                                                                            |
| <i>Liua shihi</i> | 109.5764  | 31.4049  | Luo, J.; Gao, H.; Wang, Y.; etc. Study and Protection of Amphibian Species Diversity in Chongqing. <i>Sichuan Journal of Zoology</i> 2005, 378-385. (In Chinese with English Abstract)                                                                                     |
| <i>Liua shihi</i> | 110.3476  | 31.0481  |                                                                                                                                                                                                                                                                            |
| <i>Liua shihi</i> | 110.6825  | 31.7505  |                                                                                                                                                                                                                                                                            |
| <i>Liua shihi</i> | 110.9844  | 30.8319  |                                                                                                                                                                                                                                                                            |
| <i>Liua shihi</i> | 108.9425  | 30.2972  | Li, S.B.; Su, Z.L.; Tong, P.; etc. Investigation on amphibian and reptile resources in Xingdoushan National Nature Reserve of Hubei Province. <i>Sichuan Journal of Zoology</i> 2010, 29, 130-133. (In Chinese with English Abstract)                                      |
| <i>Liua shihi</i> | 109.1466  | 29.6711  |                                                                                                                                                                                                                                                                            |
| <i>Liua shihi</i> | 109.4866  | 30.301   |                                                                                                                                                                                                                                                                            |
| <i>Liua shihi</i> | 108.0415  | 32.0874  | Su, Y.; Luo, J.; Gan, X.P.; etc. Investigation and Evaluation of Amphibians in Hua 'eshan National Nature Reserve. <i>Journal of Southwest China Normal University(Natural Science Edition)</i> <b>2016</b> , 41, 92-98. (In Chinese with English Abstract)                |
| <i>Liua shihi</i> | 109.8855  | 31.0805  | Tian, W.S.Z.M. New species of amphibians published by Professor Liu Chengzhao during his lifetime. <i>Sichuan</i>                                                                                                                                                          |

|                   |          |             |                                                                                                                                                                                                                                                              |
|-------------------|----------|-------------|--------------------------------------------------------------------------------------------------------------------------------------------------------------------------------------------------------------------------------------------------------------|
|                   |          |             | Journal of Zoology 2000, 105-107. (In Chinese)                                                                                                                                                                                                               |
| <i>Liua shihi</i> | 109.9028 | 31.33713333 | Zhang, P.; Zeng, X.; Fu, J.; etc. UCE Phylogenomics, detection of a putative hybrid population, and one older mitogenomic node age of <i>Batrachuperus</i> salamanders. <i>Mol Phylogenet Evol</i> 2021, 163, doi:10.1016/j.ympev.2021.107239.               |
| <i>Liua shihi</i> | 110.7475 | 32.0617     | Liu, H.; Ai, H.; Ren, S.; etc. Investigation on the diversity of amphibians and reptiles in Yerengu Nature Reserve, Fangxian County, Hubei Province. <i>Sichuan Journal of Zoology</i> 2010, 29, 560-564. (In Chinese with English Abstract)                 |
| <i>Liua shihi</i> | 110.7534 | 31.3545     | Shu, S.; Dai, Z.; Wu, F.; etc. Investigation on resources of amphibians and reptiles in Wanchaoshan Nature Reserve of Hubei Province. <i>Journal of Central China Normal University (Natural Sciences)</i> 2007, 278-281. (In Chinese with English Abstract) |
| <i>Liua shihi</i> | 111.0526 | 30.1712     | Dai, Z.; Zheng, Z.; Gong, R.; etc. Investigation on amphibian and reptile resources in Houhe National Nature Reserve of Hubei Province. <i>Chinese Journal of Zoology</i> 2009, 44, 48-53. (In Chinese with English Abstract)                                |
| <i>Liua shihi</i> | 111.2135 | 30.4786     | Tian, K.; Wang, Z.X.; Lei, Y.; etc. Investigation on the Biodiversities of Amphibians and Reptiles in Bengjianzi Nature Reserve, Hubei Province. <i>Sichuan Journal of Zoology</i> 2016, 35, 452-458. (In Chinese with English Abstract)                     |
| <i>Liua shihi</i> | 111.2674 | 31.8838     | Zeng, L.; Shu, S.; Wang, Q.; etc. Preliminary study on amphibians and reptiles in Wudaoxia Nature Reserve of Hubei Province. <i>Journal of Hubei University(Natural Science)</i> 2008, 30, 407-410. (In Chinese with English Abstract)                       |
| <i>Liua shihi</i> | 113.4345 | 32.3851     | Zhao, H.; Wang, Q.; Wang, C.; etc. Status and Fauna Analysis of Amphibian Resources in Henan Province. <i>Journal of Henan University(Natural Science)</i> 2015, 45, 705-711. (In Chinese with English Abstract)                                             |
| <i>Liua shihi</i> | 115.4135 | 31.8043     | Wang, X.; Pei, X.; Xu, Y.; etc. Investigation of amphibian diversity in Huangbai Mountain National Forest Park of Henan Province. <i>Chinese Journal of Zoology</i> 2011, 46, 53-56. (In Chinese with English Abstract)                                      |

**Table S2.** The distribution data of *Liua shihi* collected on website.

| Species           | Longitude  | Latitude  | Source                                                                                                            |
|-------------------|------------|-----------|-------------------------------------------------------------------------------------------------------------------|
| <i>Liua shihi</i> | 107.996238 | 32.822187 | The Global Biodiversity Information Facility<br>website ( <a href="http://www.gbif.org">http://www.gbif.org</a> ) |
| <i>Liua shihi</i> | 108.347116 | 30.945958 |                                                                                                                   |
| <i>Liua shihi</i> | 108.85     | 30.3      |                                                                                                                   |
| <i>Liua shihi</i> | 109.08747  | 31.77473  |                                                                                                                   |
| <i>Liua shihi</i> | 109.848823 | 31.485095 |                                                                                                                   |
| <i>Liua shihi</i> | 109.881853 | 31.071815 |                                                                                                                   |
| <i>Liua shihi</i> | 109.897798 | 31.33769  |                                                                                                                   |
| <i>Liua shihi</i> | 109.91026  | 31.37432  |                                                                                                                   |
| <i>Liua shihi</i> | 109.969182 | 31.406233 |                                                                                                                   |
| <i>Liua shihi</i> | 110.09431  | 31.361518 |                                                                                                                   |
| <i>Liua shihi</i> | 110.131327 | 31.454329 |                                                                                                                   |
| <i>Liua shihi</i> | 110.266667 | 31.216667 |                                                                                                                   |
| <i>Liua shihi</i> | 110.310421 | 31.435606 |                                                                                                                   |
| <i>Liua shihi</i> | 110.392936 | 31.020833 |                                                                                                                   |
| <i>Liua shihi</i> | 110.420354 | 31.456274 |                                                                                                                   |
| <i>Liua shihi</i> | 110.45575  | 31.40684  |                                                                                                                   |
| <i>Liua shihi</i> | 110.619154 | 31.656546 |                                                                                                                   |
| <i>Liua shihi</i> | 110.680447 | 31.743483 |                                                                                                                   |
| <i>Liua shihi</i> | 111.04204  | 31.01894  |                                                                                                                   |
| <i>Liua shihi</i> | 112        | 31        |                                                                                                                   |
| <i>Liua shihi</i> | 109.3685   | 32.3948   |                                                                                                                   |

**Table S3.** The distribution data of *Liua shihi* collected from field survey.

| Species           | Longitude   | Latitude    | The field survey site                         |
|-------------------|-------------|-------------|-----------------------------------------------|
| <i>Liua shihi</i> | 109.9823512 | 31.41700603 | Wushan County, Chongqing City                 |
| <i>Liua shihi</i> | 109.9819247 | 31.41689044 |                                               |
| <i>Liua shihi</i> | 109.9825162 | 31.41703236 |                                               |
| <i>Liua shihi</i> | 109.9826409 | 31.41705296 |                                               |
| <i>Liua shihi</i> | 109.8856938 | 31.36656954 |                                               |
| <i>Liua shihi</i> | 109.9815334 | 31.47246185 |                                               |
| <i>Liua shihi</i> | 109.8855919 | 31.36653748 |                                               |
| <i>Liua shihi</i> | 109.8854926 | 31.36650083 |                                               |
| <i>Liua shihi</i> | 109.1898818 | 31.52490621 | Wuxi County, Chongqing City                   |
| <i>Liua shihi</i> | 109.1901729 | 31.5247736  |                                               |
| <i>Liua shihi</i> | 109.1901018 | 31.52477246 |                                               |
| <i>Liua shihi</i> | 109.1902064 | 31.52454725 |                                               |
| <i>Liua shihi</i> | 109.1747716 | 31.49160188 |                                               |
| <i>Liua shihi</i> | 108.9422603 | 31.63721609 |                                               |
| <i>Liua shihi</i> | 108.9423877 | 31.63763512 |                                               |
| <i>Liua shihi</i> | 108.9418392 | 31.63630721 |                                               |
| <i>Liua shihi</i> | 108.9419062 | 31.63666003 |                                               |
| <i>Liua shihi</i> | 108.9420685 | 31.6372001  |                                               |
| <i>Liua shihi</i> | 108.9421396 | 31.63708249 |                                               |
| <i>Liua shihi</i> | 108.9421463 | 31.63742618 |                                               |
| <i>Liua shihi</i> | 108.9422026 | 31.63737251 |                                               |
| <i>Liua shihi</i> | 108.9423877 | 31.6377493  |                                               |
| <i>Liua shihi</i> | 108.9423139 | 31.63782009 |                                               |
| <i>Liua shihi</i> | 108.9416592 | 31.63675978 |                                               |
| <i>Liua shihi</i> | 108.9424789 | 31.63796396 |                                               |
| <i>Liua shihi</i> | 108.9428665 | 31.63804617 |                                               |
| <i>Liua shihi</i> | 109.0714288 | 31.80306241 | Chengkou County, Chongqing City               |
| <i>Liua shihi</i> | 108.9976318 | 31.80571915 |                                               |
| <i>Liua shihi</i> | 108.8901074 | 31.78364575 |                                               |
| <i>Liua shihi</i> | 108.5450077 | 31.88457261 |                                               |
| <i>Liua shihi</i> | 108.5449541 | 31.88450884 |                                               |
| <i>Liua shihi</i> | 108.5448857 | 31.88441091 |                                               |
| <i>Liua shihi</i> | 108.5448374 | 31.88433006 |                                               |
| <i>Liua shihi</i> | 108.544765  | 31.88421846 |                                               |
| <i>Liua shihi</i> | 109.06666   | 31.81666    |                                               |
| <i>Liua shihi</i> | 108.6573494 | 32.06806518 |                                               |
| <i>Liua shihi</i> | 110.4102339 | 31.41094468 | Shennongjia Forestry District, Hubei Province |
| <i>Liua shihi</i> | 110.4072545 | 31.42312594 |                                               |
| <i>Liua shihi</i> | 110.3820799 | 31.4353101  |                                               |
